# Supplementary material for: Novel interaction between Alzheimer’s disease-related protein presenilin 1 and glutamate transporter 1
Source: PubMed Central journal article supplement (PMC5992168; doi:10.1038/s41598-018-26888-2), 2018-06-07

## **Supplementary information**

### **TITLE**

Novel interaction between Alzheimer's disease-related protein presenilin 1 and glutamate transporter 1

### **AUTHORS**

Zoltowska Katarzyna Marta\*, Maesako Masato\*, Meier Joshua, Berezovska Oksana#

\* Contributed equally

# Corresponding author

# ENTIRE WESTERN BLOT GELS

## Figure 1A

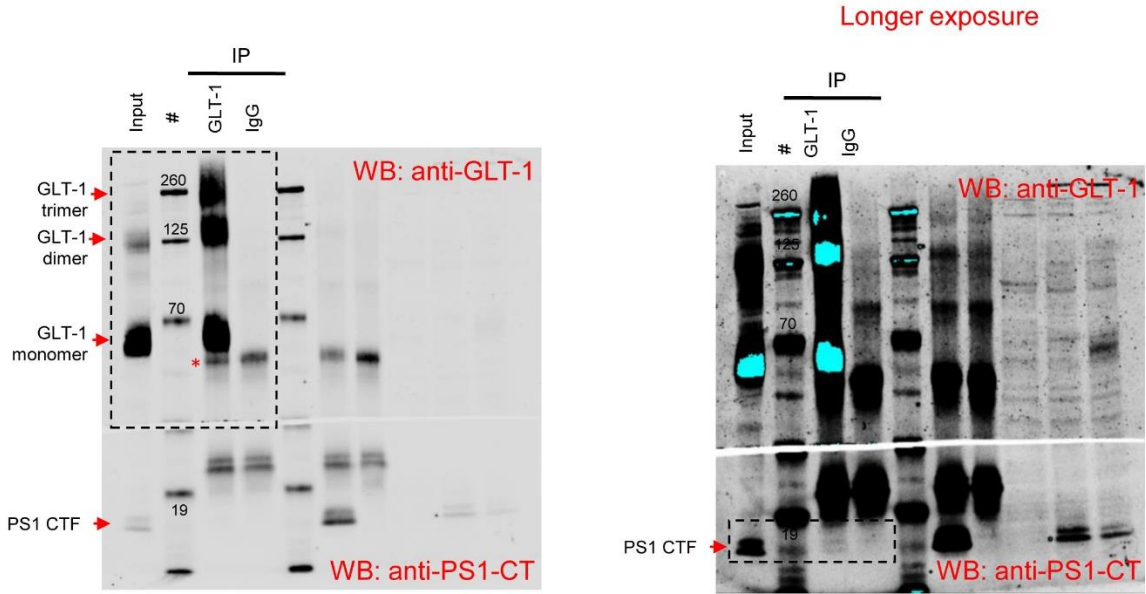

## Figure 1C

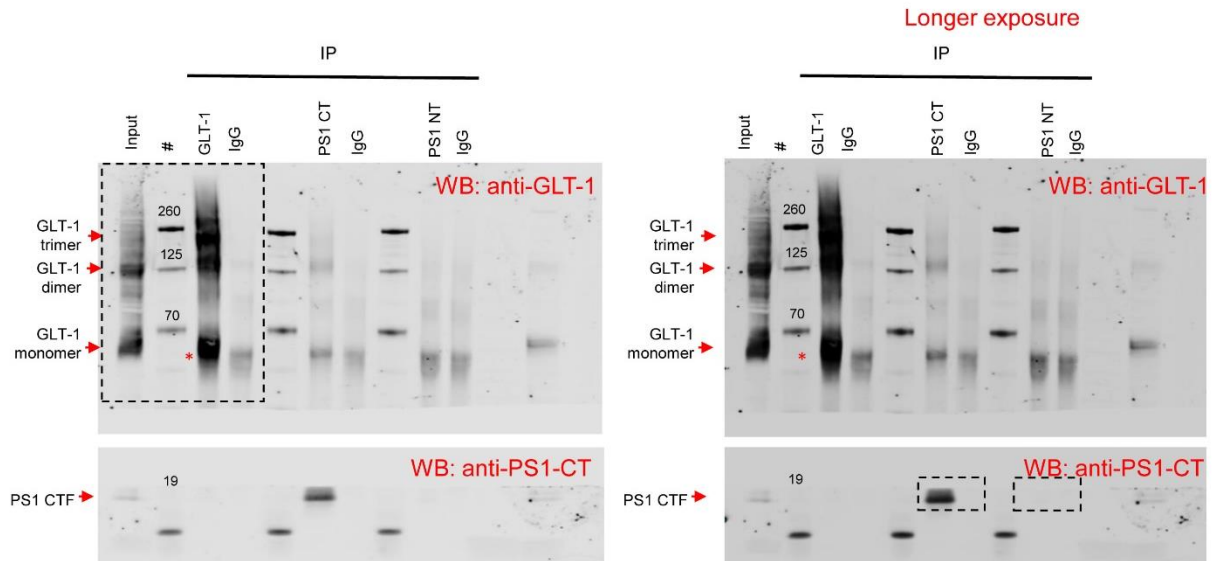

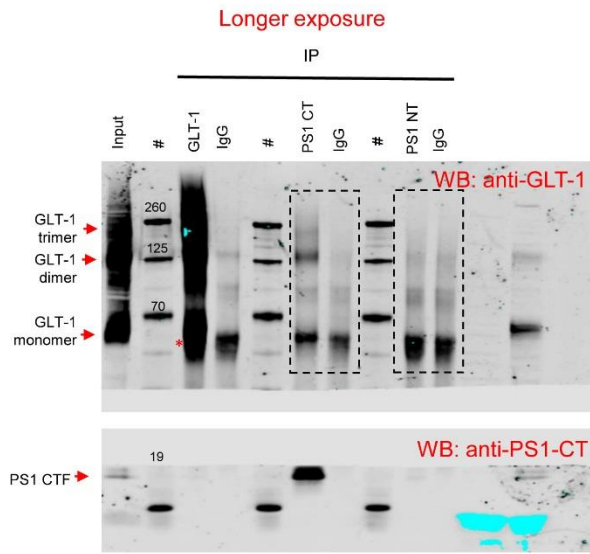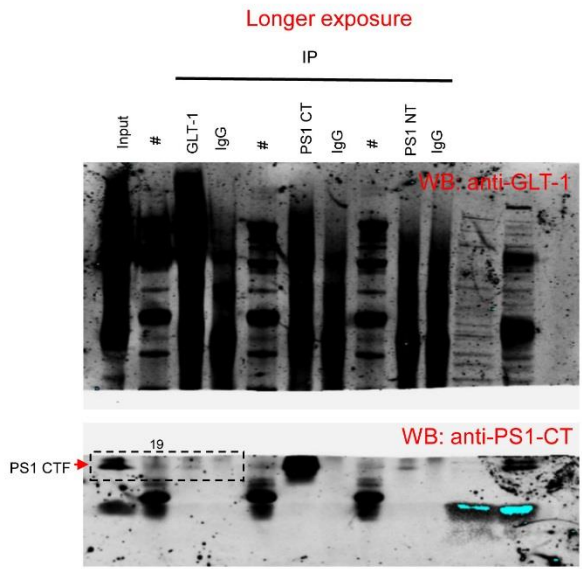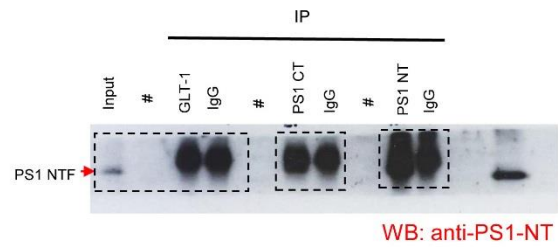

Figure 2A

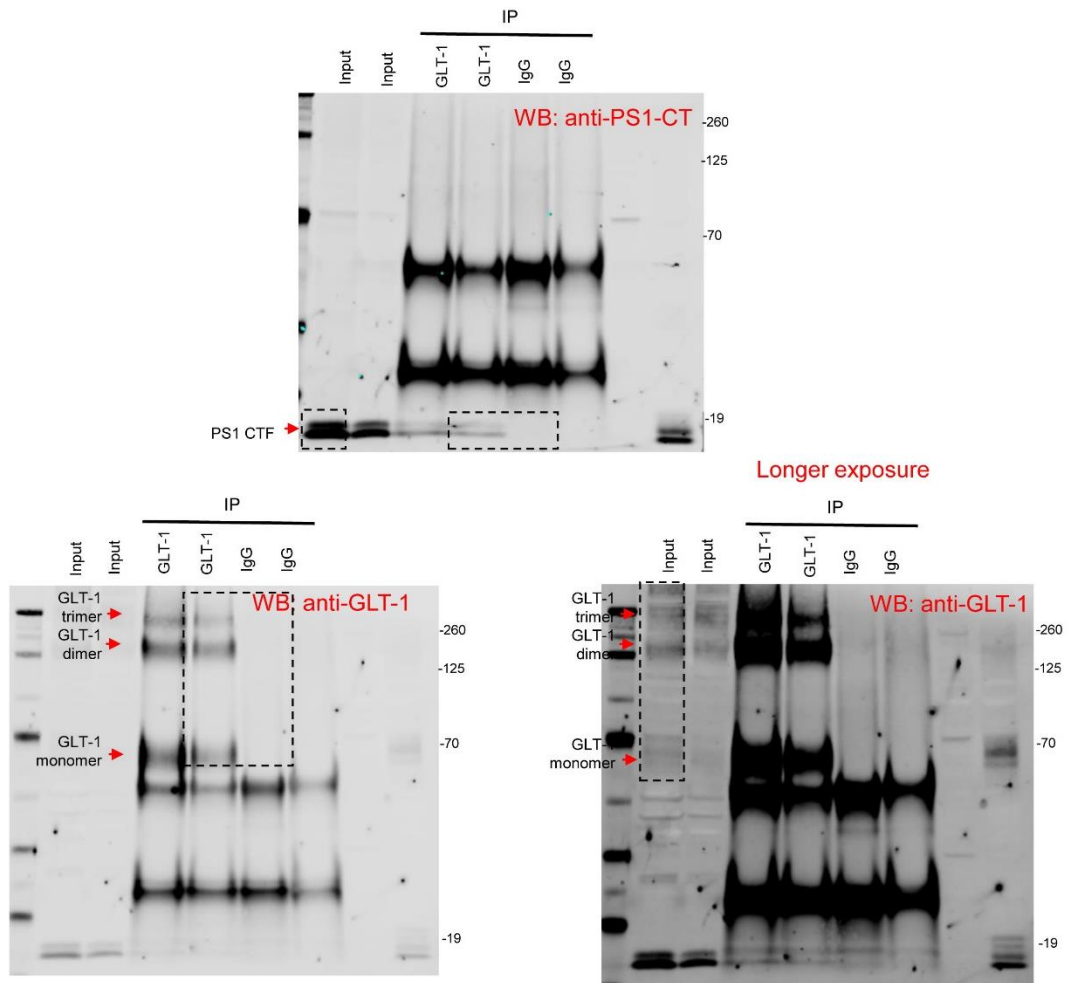

**Figure 2D**

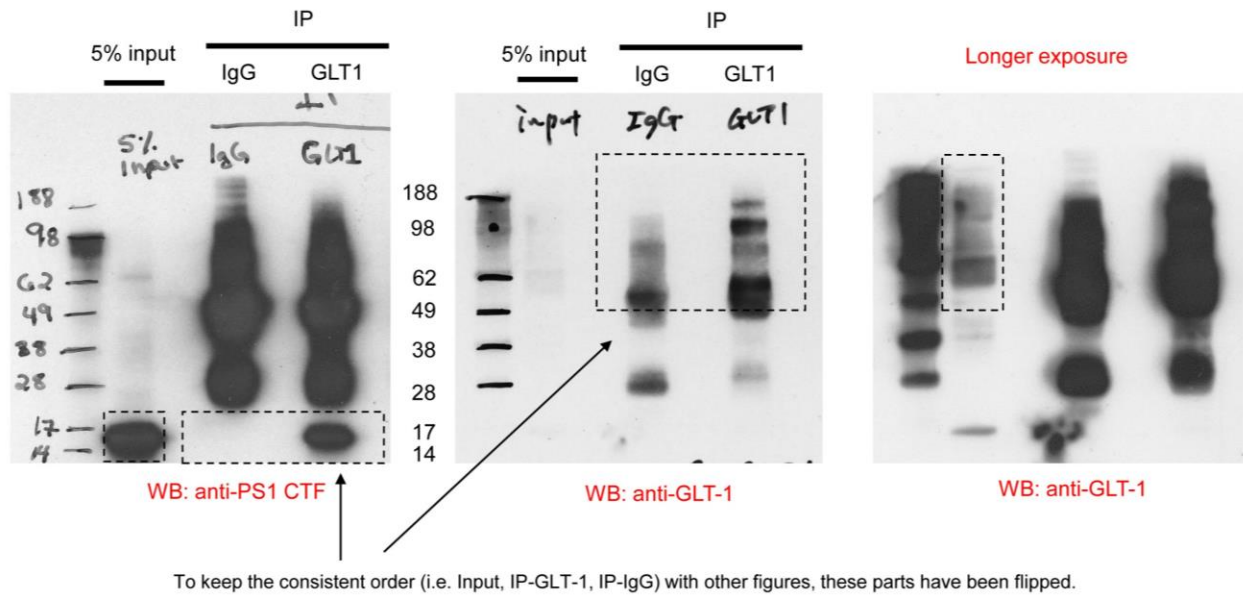

**Figure 3A**

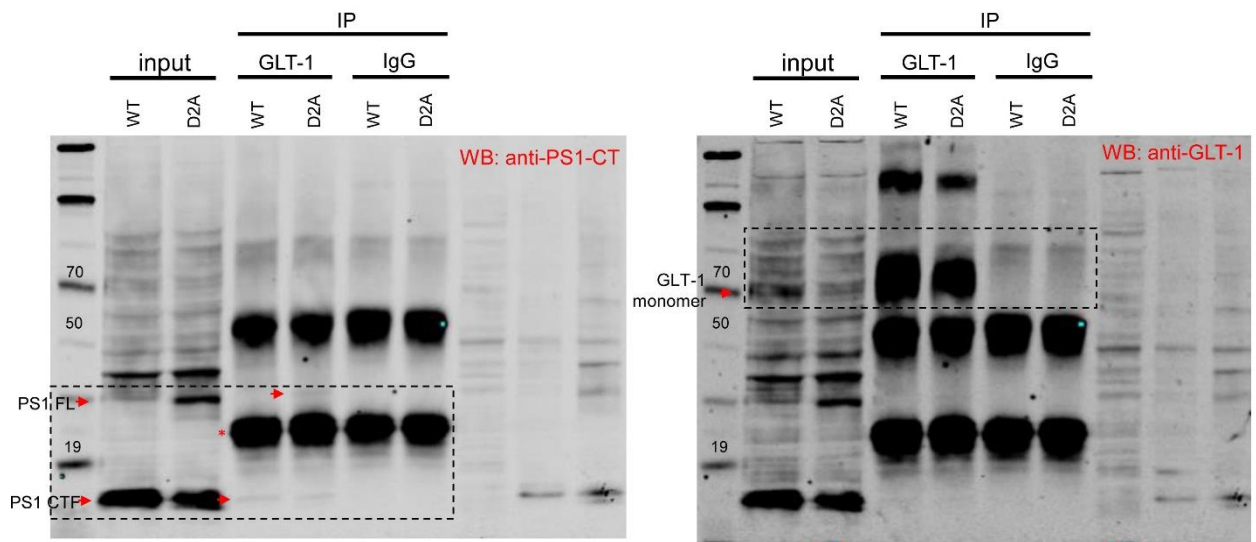

Supplement: 41598_2018_26888_MOESM1_ESM.pdf [file 41598_2018_26888_MOESM1_ESM.pdf]
